# Supplementary material
Source: PubMed Central journal article supplement (PMC2808631)
Supplement: NIHMS154601-supplement-2.pdf [file NIHMS154601-supplement-2.pdf]

# Chemical reprogramming of *Caenorhabditis elegans* germ cell fate

Clinton T. Morgan, Myon-Hee Lee, and Judith Kimble

## Supplementary Information

### Supplementary Methods

**Strains.** Wild-type Bristol isolate N2 was maintained at 20°C as described<sup>1</sup>. The *puf-8(q725); lip-1(zh15)* mutant was maintained using the balancer chromosome *mIn1[mIs14 dpy-10(e128)]*. Experiments were done with homozygotes obtained from a heterozygous mother, except the fertility experiments involving progeny generated from the induced oocytes of mutant (double homozygous) parents.

**Microscopy and immunofluorescence.** Nomarski differential interference contrast (DIC) microscopy and immunofluorescence analysis of DAPI (4',6-diamidino-2-phenylindole), RME-2 and SP56 were performed as described<sup>2,3</sup>, with the following exceptions: the  $\alpha$ -SP56 antibody was used at a 1:50 dilution and detected with 1:500 FITC-conjugated  $\alpha$ -rat secondary antibody and  $\alpha$ -RME-2 was detected with Cy3-conjugated  $\alpha$ -rabbit secondary antibody.

**Small-molecule treatments.** For the small-molecule treatments, *puf-8; lip-1* double mutants were synchronized by the alkaline hypochloride method<sup>4</sup> and arrested in M9 media at the L1 stage. L1s were then plated onto NGM and grown at 20°C for 68 hours, corresponding to day one of adult life. Adults were removed from plates and then added to 1 mL of liquid culture containing *OP50 E. coli*, S-media<sup>5</sup>, and small-molecules in DMSO in 12-well tissue culture dishes. Small-molecules were prepared as 10 mM stock solutions in DMSO and stored at -80°C.

U0126 preparations were used fresh. Volumes of small-molecule and/or DMSO were between 0-10  $\mu$ L per mL of liquid culture. Liquid cultures were incubated at 20°C on a rotator for the indicated durations and then analyzed as appropriate.

U0126 (1,4-diamino-2,3-dicyano-1,4-bis[2-aminophenylthio] butadiene monoethanolate) and U0124 (1,4-diamino-2,3-dicyano-1,4-bis(methylthio)butadiene) were purchased from Sigma-Aldrich at  $\geq$ 98% and  $\geq$ 95% purity (HPLC), respectively. PD0325901 (N-[(R)-2,3-dihydroxypropyl]oxy]-3,4-difluoro-2-[(2-fluoro-4-iodophenyl)amino]benzamide) was purchased at  $>$ 98% purity (HPLC) from StemGent. PD098059 (2'-amino-3'-methoxyflavone) and PD169316 (4-(4-fluorophenyl)-2-(4-nitrophenyl)-5-(4-pyridyl)-1H-imidazole) were purchased at  $\geq$ 98% purity (HPLC) from Calbiochem. STI-571/Gleevec (4-[(4-methyl-1-piperazinyl)methyl]-N-[4-methyl-3-[[4-(3-pyridinyl)-2-pyrimidinyl]amino]-phenyl]benzamide methanesulfonate) was purchased at  $>$ 99% purity (HPLC and TLC) from LC Labs. Akti-1/2 (1,3-dihydro-1-[1-[[4-(6-phenyl-1H-imidazo[4,5-g]guinoxalin-7-yl)phenyl]methyl]4-piperidinyl]-2H-benzimidazol-2-one) was purchased at  $\geq$ 95% purity (HPLC) from Calbiochem and BIO (6-bromoindirubin-3-oxime) was purchased at  $\geq$ 98% purity (HPLC) from Sigma-Aldrich.

**Western blots.** For western blot analysis, the indicated treatments were performed in liquid culture. After treatment, 25 whole animals per treatment were picked and flash frozen. Samples were then boiled in SDS-PAGE loading buffer and whole worm lysate was electrophoresed on 4-12% pre-cast polyacrylamide gels (Lonza) for 120 min at 20 mA. Proteins were electroblotted onto PVDF membranes for 45 min at 185 mA. Blots were blocked for 1 hour with 5% milk in TBS with 0.1% Tween-20. For detection of activated MPK-1/ERK, blots were probed with a 1:5000 dilution of mouse monoclonal anti-Activated MAP Kinase (Diphosphorylated ERK-1&2) (Sigma-Aldrich) in 1% milk/TBS-T, followed by washing and incubation with 1:10,000 HRP-anti-Mouse (Jackson ImmunoResearch). Blots were then stripped with Restore<sup>®</sup> Plus Western Blot Stripping Buffer (Pierce). Blots were re-blocked and re-probed with 1:10,000 Mouse monoclonal anti- $\alpha$ -tubulin monoclonal (Sigma-Aldrich) and 1:10,000 HRP-conjugated anti-

mouse (Jackson ImmunoResearch). For detection of total MPK-1/ERK, blots were stripped, blocked, and probed with 1:20,000 Rabbit polyclonal anti-ERK-1/2 (Sc94; Santa Cruz Biotechnology) and 1:10,000 HRP-anti-Rabbit (Jackson ImmunoResearch).

Semi-quantitative Western blot analysis was performed using the program ImageJ<sup>6</sup>. Pixel density ratios were generated for activated MPK-1/ERK to tubulin (loading control) for each lane. The ratio for the untreated group was set to 100% MPK-1/ERK activity and compared to the ratios for U0126 and DMSO treatment groups analyzed on the same blot.

**RNA interference.** Feeding RNAi was carried out as described<sup>7</sup>. Briefly, L4 *puf-8/mIn1[mIs14 dpy-10(e128)]; lip-1* animals were fed *HT115 E. coli* transformed with either the empty RNAi vector vL4440 or vL4440 expressing dsRNA of *mpk-1b* exon 1, *ced-4*, *abl-1*, or *akt-1*. For *fog-1* RNAi, *puf-8; lip-1* animals were placed on RNAi at the L2 stage, allowing sperm to be generating prior to oocyte induction. For *mpk-1b* isoform-specific RNAi, the unique region (exon 1; 1-204 nt) of the *mpk-1b* gene was amplified by PCR from *C. elegans* genomic DNA and cloned into the pPD129.36 (L4440) vector<sup>7</sup> containing two convergent T7 polymerase promoters in opposite orientations separated by a multicloning site. The *fog-1* RNAi construct was described previously<sup>8</sup>. RNAi constructs for *ced-4*, *abl-1* and *akt-1* were obtained from the *C. elegans* RNAi Library (MRC Geneservice). *puf-8; lip-1* progeny were picked at ~48 hours post-L4 and assessed by presence of oocytes.

**Proliferation assay.** Mutants were treated for 24 hours with U0126 or vehicle to obtain animals with induced oocytes or only sperm, respectively. DNA of S-phase germ cells was labeled with the thymidine analog EdU (5-ethynyl-2'-deoxyuridine)<sup>9</sup> by feeding the animals EdU-labeled *MG1693 E. coli* for 3 hours. Germlines were extruded and fixed as previously described<sup>2,3</sup>. EdU was conjugated to Alexa Fluor<sup>®</sup> azide (Invitrogen) by the “Click” reaction, as per Click-iT™ EdU Imaging Kit (Invitrogen) instructions, and all germline nuclei were then DAPI stained. The percentage of EdU-labelled nuclei was determined by the ratio of EdU+ to total (i.e. DAPI+)

nuclei between the distal tip cell (DTC) and the most proximal EdU+ germ cell (on average, this EdU+ cell was  $18 \pm 2$  cell diameters/rows from the DTC).

1. Brenner, S. The genetics of *Caenorhabditis elegans*. *Genetics* **77**, 71-94 (1974).
2. Lee, M.-H. et al. Conserved regulation of MAP kinase expression by PUF RNA-binding proteins. *PLoS Genet.* **3**, e233 (2007).
3. Bachorik, J.L. & Kimble, J. Redundant control of the *Caenorhabditis elegans* sperm/oocyte switch by PUF-8 and FBF-1, two distinct PUF RNA-binding proteins. *Proc. Natl. Acad. Sci. USA* **102**, 10893-10897 (2005).
4. Sulston, J. & Hodgkin, J. Methods. in *The nematode Caenorhabditis elegans*, Vol. 17 (ed. Wood, W.B.) 587-606 (Cold Spring Harbor Laboratory Press, Cold Spring Harbor, NY, 1988).
5. Stiernagle, T. Maintenance of *C. elegans*. *WormBook* (2006).  
<<http://www.wormbook.org>>. doi:10.1895/wormbook.1.101.1.
6. Rasband, W.S. ImageJ. (U.S. National Institutes of Health, Bethesda, Maryland, USA, 1997-2008).
7. Timmons, L. & Fire, A. Specific interference by ingested dsRNA. *Nature* **395**, 854 (1998).
8. Thompson, B.E. et al. Dose-dependent control of proliferation and sperm specification by FOG-1/CPEB. *Development* **132**, 3471-3481 (2005).
9. Salic, A. & Mitchison, T.J. A chemical method for fast and sensitive detection of DNA synthesis in vivo. *Proc. Natl. Acad. Sci. USA* **105**, 2415-20 (2008).

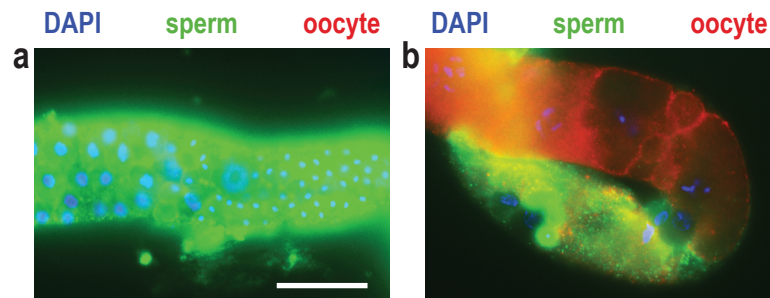

**Supplementary Figure 1. U0126 induces oocytes when solubilized in ethanol**

(a) Immunohistochemical analysis showed strong staining for sperm marker SP56 (green) and no staining for oocyte marker RME-2 (red) in control ethanol (vehicle) treated *puf-8; lip-1* mutants. DAPI (blue) staining showed numerous compact sperm nuclei. (b) Analysis of animals treated with U0126 (in ethanol vehicle) revealed both SP56 positive sperm and RME-2 positive oocytes. DAPI (blue) staining showed oocyte bivalent chromosomes in RME-2 positive cells and compact sperm nuclei in SP56 positive cells. Scale bar, 10  $\mu$ m.

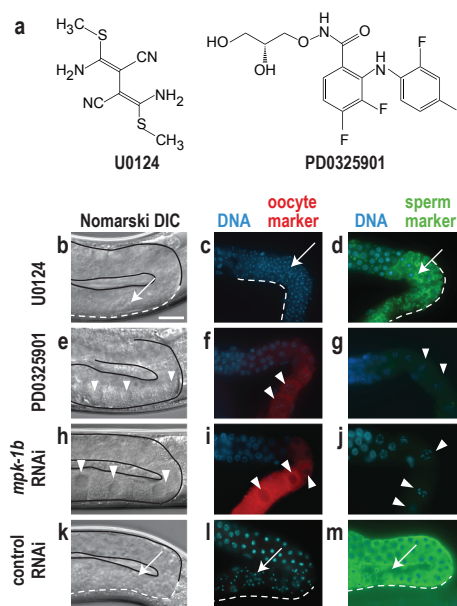

**Supplementary Figure 2. Fate switching occurs through Ras-ERK inhibition**

(**a**) Structures of U0124, an inactive analog of U0126, and the structurally distinct MEK-1/2 inhibitor PD0325901. (**b-m**) Effects of U0124 (**b-d**), PD0325901 (**e-g**), *mpk-1b* RNAi (**h-j**), and vector control (**k-m**) on mutant germ cells. Oocytes are indicated with arrowheads. The extent of sperm is indicated with white dashed lines and representative single sperm with arrows. Scale bar, 10  $\mu$ m.

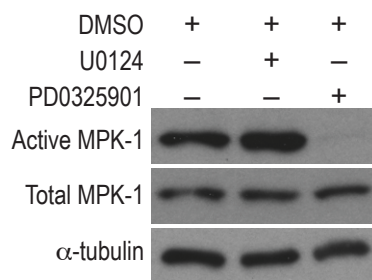

**Supplementary Figure 3. Effects of U0124 and PD0325901 on MPK-1/ERK activity**  
Representative Western blot analysis of activated MPK-1/ERK (top panel), total MPK-1/ERK (middle panel), and  $\alpha$ -tubulin (bottom panel) from DMSO, 50  $\mu$ M U0124 and 50  $\mu$ M PD0325901 treated animals.

## Supplementary Table 1.

### Effects of treatments on *puf-8*; *lip-1* germlines

| Treatment                                  | Target Pathway | Oocyte-positive (%) | n*  |
|--------------------------------------------|----------------|---------------------|-----|
| Untreated                                  | N/A            | 0                   | 199 |
| <b><u>Small-molecules</u></b> <sup>‡</sup> |                |                     |     |
| DMSO                                       | N/A            | 0                   | 121 |
| U0126 (1)                                  | ERK MAPK       | 99                  | 158 |
| U0124 (2)                                  | N/A            | 0                   | 77  |
| PD0325901 (3)                              | ERK MAPK       | 91                  | 35  |
| PD098059 (4)                               | ERK MAPK       | 5                   | 75  |
| PD169316 (5)                               | p38 MAPK       | 0                   | 45  |
| STI-571 (6)                                | Abelson kinase | 0                   | 39  |
| Akti-1/2 (7)                               | AKT/PKB        | 0                   | 19  |
| BIO (8)                                    | GSK-3          | 0                   | 28  |
| <b><u>RNA-interference</u></b>             |                |                     |     |
| vector                                     | N/A            | 0                   | 63  |
| <i>mpk-1b</i>                              | ERK MAPK       | 99                  | 98  |
| <i>abl-1</i>                               | Abelson kinase | 0                   | 27  |
| <i>akt-1</i>                               | AKT/PKB        | 0                   | 43  |

<sup>‡</sup> All small-molecules were delivered at 50  $\mu$ M, except as follows: PD098059 was used at 100  $\mu$ M; STI-571 was used at the optimal concentration of 100 nM<sup>1</sup>; Akti-1/2 was used at 10  $\mu$ M.

\* number of *puf-8*; *lip-1* mutants examined for oocytes by DIC

1. Deng, X. et al. *Caenorhabditis elegans* ABL-1 antagonizes p53-mediated germline apoptosis after ionizing irradiation. *Nature Genetics* **36**, 906-912 (2004).



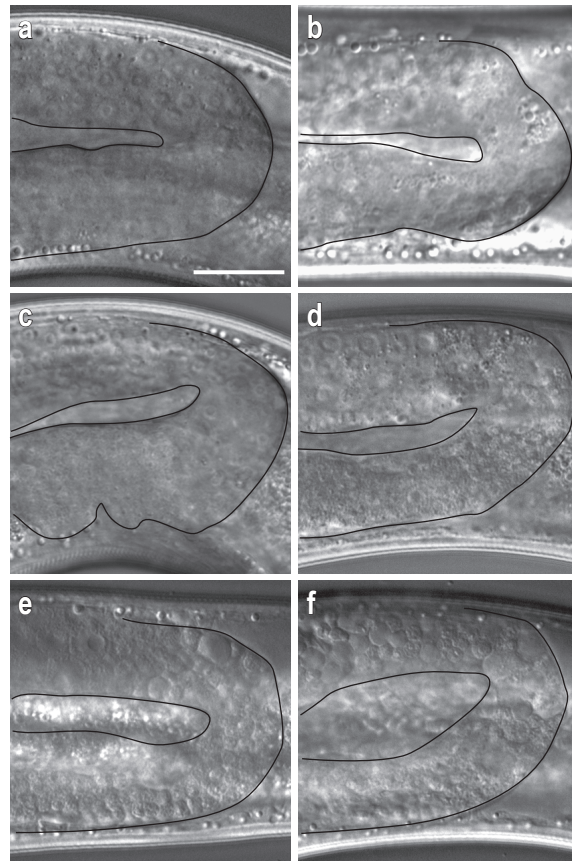

**Supplementary Figure 4. The sperm/oocyte fate decision is not affected by chemical or genetic inhibition of p38 MAPK, GSK-3, Abl kinase, or AKT**

(a-f) DIC micrographs showing absence of oocytes in *puf-8; lip-1* germlines treated with (a) p38 MAPK inhibitor PD169316, (b) Abl kinase inhibitor STI-571/Gleevec, (c) AKT-1/2 inhibitor Akti-1/2, (d) GSK-3 inhibitor BIO, (e) *abl-1* RNAi, (f) and *akt-1* RNAi. Scale bar, 10  $\mu$ m.
